# Supplementary material for: Ligand-induced native G-quadruplex stabilization impairs transcription initiation
Source: HighWire-hosted journal article supplement (doi:10.1101/gr.275431.121), 2021-08-16
Supplement: Supplemental_Materials.docx [file Supplemental_Materials.docx]

### Supplemental Materials

**Ligand-induced** **native G-quadruplexes stabilization impairs transcription initiation**

Conghui Li1,7, Honghong Wang1,7, Zhinang Yin1,7, Pingping Fang2,7, Ruijing Xiao1,3, Ying Xiang1, Wen Wang1, Qiuzi Li4, Beili Huang1, Jian Huang4, and Kaiwei Liang1,5,6

1Department of Pathophysiology, School of Basic Medical Sciences, Wuhan University, Wuhan 430071, China; 2Department of Pharmacology, School of Basic Medical Sciences, Wuhan University, Wuhan 430071, China; 3Department of Immunology, School of Basic Medical Sciences, Wuhan University, Wuhan 430071, China; 4College of Life Sciences, Wuhan University, Wuhan 430071, China; 5Hubei Province Key Laboratory of Allergy and Immunology, School of Basic Medical Sciences, Wuhan University, Wuhan 430071, China; 6Research Center for Medicine and Structural Biology, School of Basic Medical Sciences, Wuhan University, Wuhan 430071, China.

7 These authors contributed equally to this work.

Corresponding author: Kaiwei Liang (KWliang@whu.edu.cn)

Table of Contents:

Supplemental Methods Pages 2-20

Supplemental Figures Pages 21-32

Supplemental Table Pages 33

**Supplemental Methods**

**Cell Lines**

HEK293T, HeLa, U937 and SW1271 cells were obtained from ATCC and cultured at 37°C with 5% CO2. HEK293T and HeLa cells were maintained in DMEM (Life Technologies) supplemented with 10% fetal bovine serum (FBS, LONSERA). U937 and SW1271 cells were cultured in RPMI-1640 and DMEM-F12 medium (Life Technologies), respectively. MDA-231-LM2 (LM2) cells were kindly provided by Dr. Yibin Kang and cultured in DMEM supplemented with 10% FBS. *Drosophila* S2 cells were obtained from Invitrogen and maintained in Schneider's medium. Mouse embryonic fibroblasts (MEF) cells were maintained in DMEM with 10% FBS. Live cells were quantified using the TC20 automated cell counter (Bio-Rad).

**Chemicals and Antibodies**

Flavopiridol (FP, CAS: 146426-40-6) was purchased from Cayman Chemical. TMPyP4 tosylate (TMPyP4, CAS: 36951-72-1) was obtained from MedChemExpress (MCE), and Pyridostatin trihydrochloride (PDS, CAS: T4457) was purchased from Topscience Co., Ltd. All compounds were dissolved in Dimethyl Sulfoxide (DMSO, Sigma-Aldrich) to make the stock solution. Pol II Rpb1 (POLR2A) NTD (D8L4Y) rabbit mAb, Acetyl-Histone H3 (Lys27) (D5E4) XP rabbit mAb, TAF1 (D6J8B) rabbit mAb, TFIIB (GTF2B, 2F6A3H4) mouse mAb, and COBRA1 (NELF-B, D6K9A) rabbit mAb were purchased from Cell Signaling Technology. TBP mouse mAb (66166-1-Ig) was purchased from Proteintech and FLAG-synthetic antibody (M2) was obtained from Sigma-Aldrich. Mouse Anti-Histag antibody (AE003) was purchased from ABclonal. Homemade histone H3 Lysine 4 methylation antibodies were generated as previously described (Liang et al. 2015).

**BG4 and BG4-EGFP Antibodies**

The scFv antibody, BG4, was purified using the expression vector pSANG10-3F-BG4 (Addgene, plasmid no. 55756) according to the previous study (Hansel-Hertsch et al. 2018). Briefly, BL21 (DE3) *E. coli* carrying pSANG10-3F-BG4 plasmid was cultured in 2×YT medium supplemented with 50 µg/mL kanamycin until OD600 reached 0.6, then 0.5 mM IPTG was added to induce the expression of BG4 at 37°C for 4 hours. The BL21 *E. coli* was collected, resuspended and incubated in ice-cold TES buffer (50 mM Tris-HCl at pH 8.0 and 20% (wt/vol) sucrose) for 10 minutes. The suspension was then diluted with two-fold volume of ice-cold water and incubated on ice for another 10 minutes to extract the expressed periplasmic BG4. The extracted protein was further centrifuged at 16,000 g for 30 minutes at 4°C. The supernatant was further purified with the Ni NTA beads 6FF (Smart-Lifesciences). The eluted BG4 antibody was concentrated with Amicon Ultra-15 centrifugal filter unit (Millipore, cat. no. UFC901008, 10 KDa cutoff) and dialyzed against PBS buffer.

The EGFP coding sequence was amplified from the EGFP-Tpr (Addgene #35024) and subcloned into pSANG10-3F-BG4 to generate the BG4-EGFP expression plasmid, which was chemically transformed into BL21 (DE3) competent cells. Expression of BG4-EGFP was induced by 0.2 mM IPTG at 16°C, 200 rpm for 14 hours. BG4-EGFP protein was purified with the Ni NTA beads 6FF (Smart-Lifesciences) and was eluted in HXG buffer supplemented with 250 mM imidazole. The eluted His-BG4-EGFP protein was dialyzed against PBS buffer and concentrated with an Amicon Ultra-15 centrifugal filter unit (Millipore, cat. no. UFC903008, 30 KDa cutoff). The purity of BG4-EGFP protein was analyzed by SDS-PAGE and Coomassie blue staining.

**G4 Chromatin Immunoprecipitation Sequencing (G4 ChIP-seq)**

### G4 ChIP-seq was performed according to a previously published protocol (Hansel-Hertsch et al. 2018) with minor modifications. After fixation and chromatin shearing, 0.25% Triton X-100 was added to the chromatin and centrifuged at 20,000 g for 10 minutes to remove the insoluble debris. 12.5 μl chromatin was immunoprecipitated with 800 ng BG4 antibodies and pre-blocked 5 μl Anti-DYKDDDDK affinity beads (Smart-Lifesciences) sequentially. The beads were washed with 200 μl wash buffer (10 mM Tris-HCl at pH 7.4, 100 mM KCl and 0.1% Tween-20) at a 37°C rotating incubator (1,400 rpm) for 10 minutes. The captured DNA was eluted and reverse-crosslinked with 75 μl TE buffer and 1 μl 200 mg/mL proteinase K by incubation under rotation (1,400 rpm) for 1 hour at 37℃ and then for 2 hours at 65°C. The DNA was further purified with phenol-chloroform extraction and ethanol precipitation. The G4 ChIP-seq libraries were prepared with the NEBNext ultra II DNA library prep kit for Illumina. The libraries were analyzed on an Agilent bioanalyzer and sequenced on a NovaSeq 6000. G4 ChIP-seq reads were aligned to the human genome (UCSC hg38) with Bowtie version 1.1.2 (Langmead et al. 2009), allowing only uniquely mapping reads with up to three mismatches within the 150 bp reads. The resulting reads were extended to 200 bp toward the interior of the sequenced fragments and normalized to the total reads mapped (reads per million, r.p.m.). Peaks were called using MACS2 (model-based analysis of ChIP-Seq) version 2.1.2 (Zhang et al. 2008) with default parameters and a q-value cutoff of 0.001. To perform the motif analysis, the summits of the called G4 ChIP-seq peaks were extended to 50 bp to fetch the DNA sequences, and MEME-ChIP (Bailey et al. 2009) was used.

### Cleavage Under Targets and Tagmentation with BG4 (G4-CUT&Tag)

The N terminal 3×Flag tagged protein A and Tn5 Transposase coding sequence was amplified from 3×Flag-pA-Tn5-Fl plasmid (Addgene # 124601) and cloned into pET16b to generate the His-pA-3×Flag-Tn5 expression plasmid. Recombinant pA-Tn5 purification and pA-Tn5 transposome assembly have been described in detail previously (Wang et al. 2021).

Cleavage Under Targets and Tagmentation (CUT&Tag) was performed as described before (Kaya-Okur et al. 2019; Wang et al. 2019) with some modifications. Briefly, half millioncells were washed twice with 1.5 mL wash buffer (20 mM HEPES at pH 7.5, 150 mM KCl, 0.5 mM spermidine and 1× protease inhibitors) by gentle pipetting. 10 μL concanavalin A coated magnetic beads (Smart-Lifesciences) were activated, and added to these cells with a 10 minutes’ incubation at room temperature. The supernatant was removed and bead-bound cells were resuspended in 100 μL dig-wash buffer (20 mM HEPES at pH 7.5, 150 mM KCl, 0.5 mM spermidine, 1× protease inhibitors, 0.05% digitonin and 0.01% NP-40) containing 2 mM EDTA and a 1:10 dilution of the 0.1 mg/mL BG4 primary antibody. For IgG controls, mouse IgG was used as a primary antibody. Primary antibody incubation was performed on a rotating platform overnight at 4°C and then the liquid was removed. The Anti-Flag M2 antibody (Sigma-Aldrich) was diluted to 1:100 in 100 μL of dig-wash buffer with 2 mM EDTA and incubated with the cells at room temperature for 30 minutes followed by removing the liquid. The rabbit anti-mouse IgG antibody was diluted 100 folds and incubated with the cells for another 1 hour and washed with dig-wash buffer three times. A 1:200 dilution of pA-Tn5 adapter complex (~0.2 μM) was prepared in dig-300 buffer (0.05% digitonin, 20 mM HEPES at pH 7.5, 300 mM KCl, 0.5 mM spermidine, 1× protease inhibitors and 0.01% NP-40). 100 μL pA-Tn5 adapter complex was added to the cells with gentle vertexing followed by one-hour incubation at room temperature. Cells were washed three times in 200 μL dig-300 buffer to remove unbound pA-Tn5 proteins. Next, bead-bound cells were resuspended in 40 μL tagmentation buffer (10 mM TAPS-NaOH at pH 8.5, 10 mM MgCl2 and 7.5% DMF) and incubated at 37°C for 1 hour. To stop tagmentation reaction, 1.5 μL 0.5 M EDTA, 0.5 μL 10% SDS and 0.5 μL 20 mg/mL proteinase K were added and incubated at 55°C for 1 hour and then for 15 minutes at 75℃. The DNA was extracted with Sera-Mag carboxylate-modified magnetic beads (GE Healthcare) for library preparation. 21 μL DNA was mixed with a universal i5 and a uniquely barcoded i7 primer, and amplified with NEB Q5 high-fidelity 2× master mix. The libraries were purified with 1.1× volume of Sera-Mag carboxylate-modified magnetic beads, and subjected to LabChip DNA analysis and Illumina sequencing.

CUT&Tag reads were aligned to the human genome (UCSC hg38) with Bowtie version 1.1.2, allowing only uniquely mapping reads with up to three mismatches within the 150 bp reads. The aligned reads were normalized to total reads aligned (reads per million, r.p.m.). The track files were made with the bamCoverage command from deeptools 3.3.0 (Ramírez et al. 2014). Peaks were called using IgG controls and MACS (model-based analysis of ChIP-Seq) version 2.1.2 with default parameters and a q-value cutoff of 1E-5. To compare the cell line specificity, peak calling was performed with whole genome sequencing data download from NCBI (SRX5466670, SRX3358201, SRX5449793, SRX6858029, and ERX4517391) with a q-value cutoff of 1E-12. To compare G4-CUT&Tag signals among cell lines, we also calculated the log2 fold changes of G4-CUT&Tag signals to their corresponding whole genome sequencing tracks to normalize the copy number variation. The distribution of G4 peaks were annotated with ChIPpeakAnno. Heatmap and metagene plots were made for the indicated windows around the transcription start sites (TSSs) using the average coverage (r.p.m.).

**Chromatin Immunoprecipitation Sequencing (ChIP-seq) and ChIP with Reference Exogenous Genome (ChIP-Rx)**

Chromatin immunoprecipitation sequencing (ChIP-seq) was performed as previously described (Liang et al. 2015). Briefly, 1×107 cells were fixed with 1% paraformaldehyde in PBS for 10 minutes and then quenched with 0.125 M glycine for 5 minutes at room temperature. Fixed cells were sequentially lysed with 10 mL lysis buffer 1 (50 mM HEPES-KOH, pH 7.5, 140 mM NaCl, 1 mM EDTA, 10% glycerol, 0.5% NP-40, 0.25% Triton X-100 and 1× protease inhibitors) and 10 mL lysis buffer 2 (10 mM Tris-HCl, pH 8.0, 200 mM NaCl, 1 mM EDTA, 0.5 mM EGTA and 1× protease inhibitors). The cells were then resuspended in 300 μl lysis buffer 3 (10 mM Tris-HCl, pH 8.0, 100 mM NaCl, 1 mM EDTA, 0.5 mM EGTA, 0.1% Na-Deoxycholate, 0.5% N-lauroylsarcosine and 1× protease inhibitors), and were sheared using the Diagenode Bruptor Plus with the high-power mode for 25 cycles (sonication cycle: 30 seconds ON, 30 seconds OFF). After sonication, 1% Triton X-100 was added to the chromatin and centrifuged at 20,000 g for 10 minutes to remove the insoluble debris. The chromatin was immunoprecipitated with 10 μg individual antibodies and 15 μl pre-blocked Protein A/G beads (Smart-Lifesciences). The beads were washed three times with 1 mL lysis buffer 3, and three times with wash buffer (50 mM HEPES-KOH, pH 7.5, 300 mM LiCl, 1 mM EDTA, 1.0% NP-40 and 0.7% Na-Deoxycholate). The immunoprecipitated DNA was eluted with 200 μl elution buffer (50 mM Tris-HCl, pH 8.0, 10 mM EDTA, 1.0% SDS and 200 μg/mL proteinase K) at 55°C for overnight, and purified by phenol-chloroform extraction and ethanol precipitation. Library preparation was done using the NEBNext ultra II DNA library prep kit for Illumina, followed by sequencing on a NovaSeq 6000.

ChIP-seq reads were aligned to the human genome (UCSC hg38) with Bowtie version 1.1.2, allowing only uniquely mapping reads with up to two mismatches within the 150 bp reads (Langmead et al. 2009). The resulting reads were extended to 200 bp toward the interior of the sequenced fragments and normalized to the total reads used for aligning (reads per million, r.p.m.). The aligned human BAM files were normalized to the total aligned reads and converted to bigwig files for visualization in the UCSC Genome Browser. Peaks were called using MACS2 (model-based analysis of ChIP-Seq) version 2.1.2 with default parameters (Zhang et al. 2008) and were annotated with ChIPseeker (Yu et al. 2015). Heatmap and metagene plots were made for the indicated windows around the transcription start site (TSS) using the average coverage (r.p.m.). For ChIP-Rx experiments, sonicated human chromatin was spiked-in with 10%-30% mouse chromatin to quantitatively normalize across experiments. ChIP signals were normalized by the normalization factors as previous reported (Orlando et al. 2014).

### Kethoxal-Assisted Single-stranded DNA Sequencing (KAS-seq)

KAS-seq was performed as reported (Wu et al. 2020) with minor modifications. Briefly, after drug treatment, HEK293T cells were labeled with 2.5 mM N3-kethoxal for 10 minutes. The cells were collected for genomic DNA purification. The extracted genomic DNA was biotinylated with DBCO-PEG4-biotin (Sigma-Aldrich) and sonicated with a Diagenode Bruptor Plus with a high-power mode for 40 cycles (sonication cycle: 30 seconds ON, 30 seconds OFF). The fragmented N3-kethoxal-modified DNA was enriched with the Dynabeads Myone Streptavidin C1 beads (Thermo Fisher Scientific) and eluted with nuclease-free water at 95˚C for 15 minutes. The elutes were then repaired with the phi29 DNA polymerase (NEB) and random hexamers, and purified with the Sera-Mag carboxylate-modified magnetic beads. The libraries were prepared with the NEBNext ultra II DNA library prep kit. Indexed libraries were pooled and sequenced on an Illumina platform. KAS-seq reads were aligned to the human genome (UCSC hg38) with Bowtie version 1.1.2, allowing only uniquely mapping reads with up to two mismatches within the 50 bp reads (Langmead et al. 2009). The resulting reads were then normalized to the total reads used for alignment (reads per million, r.p.m.) and converted to bigwig files for visualization in the UCSC Genome Browser. Heatmap and metagene plots were made for the indicated windows around the transcription start site (TSS) using the average coverage (r.p.m.).

### Assay for Transposase Accessible Chromatin with High-throughput Sequencing (ATAC-seq)

### ATAC-seq was performed as previously described (Corces et al. 2017). Briefly, 2.5×104 cells were washed with cold PBS and centrifuged at 600 g for 5 minutes. The cells were resuspended with 50 μL cold lysis buffer (10 mM Tris-HCl at pH 7.5, 10 mM NaCl, 3 mM MgCl2, 0.1% NP-40, 0.1% Tween-20 and 0.02% digitonin) and incubated on ice for 3 minutes. The cells were furthered added with 200 μL cold resuspension buffer (10 mM Tris-HCl at pH 7.5, 10 mM NaCl and 3 mM MgCl2) and centrifuged at 600 g for 5 minutes. The pellet was resuspended with 12.5 μL resuspension buffer. 10 μL 5× tagmentation buffer (50 mM TAPS-NaOH at pH 8.5 and 25 mM MgCl2), 16.5 μL PBS, 0.5 μL 10% Tween-20, 0.5 μL 1% digitonin, 0.75 μL 37.5 μM pA-Tn5 transposome and 9.5 μL nuclease-free H2O were mixed with 12.5 μL cell suspension. The transposition reaction was performed at 37°C for 60 minutes with mixing at 1,000 rpm. The reaction was stopped by adding 1.5 μL 0.5 M EDTA and 0.5 μL 10% SDS, and digested with 1 μL 20 mg/mL proteinase K (Roche) at 65°C for 6 hours. The DNA was further purified with 1× Sera-Mag carboxylate-modified magnetic beads and eluted with 20 μL H2O with 0.1% Tween-20. The purified transposed DNA was amplified with NEBNext high-fidelity 2× PCR master mix using Ad1_noMX primer and Ad2.indexing primers. The DNA libraries were size-selected with Sera-Mag carboxylate-modified magnetic beads and sequenced on the NovaSeq 6000 platform. ATAC-seq reads were aligned to human genome hg38 and *E. coli* genome. Alignments were processed with Bowtie with command option of –m 1 –v2, allowing only uniquely mapping reads with up to two mismatches within the 50 bp read. *E. coli* reads were used as spike-in controls for normalization of the ATAC-seq signals.

### Transient Transcriptome Sequencing (TT-seq)

TT-seq was performed as described previously (Schwalb et al. 2016; Liang et al. 2018) with minor modifications. Briefly, 1×107 cells were labeled with 400 µM 4-thiouridine (4sU, Sigma-Aldrich) in a CO2 incubator at 37°C for 10 minutes and then quickly lysed with 4 mL Trizol (Invitrogen). RNA was purified with chloroform extraction and precipitated with isopropyl alcohol and 5 µl 20 mg/mL glycogen (Roche). The extracted RNA was spiked in with 4sU-labeled S2 RNA and was further fragmented by base hydrolysis in 0.2 M NaOH on ice for 15 minutes, neutralized by adding 1 volume of 1 M Tris-HCl pH 6.8 and precipitated with isopropyl alcohol. Biotinylation reaction of 4sU-labeled RNA was carried out in a total volume of 250 μL, containing 100 μg total RNA, 10 mM HEPES (pH 7.5), 1 mM EDTA, and 5 μg MTSEA biotin-XX (Biotium) dissolved in DMF (final concentration of DMF = 20%) at room temperature for 30 minutes. After biotinylation, excess biotin reagents were removed by extraction with chloroform and phase lock gel. RNA supernatant was precipitated with a 1:10 volume of 5 M NaCl and an equal volume of isopropyl alcohol. The RNA pellet was resuspended in 200 μL RNase-free water. After denaturation of RNA samples at 65°C for 5 minutes followed by rapid cooling on ice for 5 minutes, biotinylated RNA was separated from non-labeled RNA using 50 µl MyOne streptavidin C1 dynabeads (Thermo Fisher Scientific). Streptavidin beads were incubated with RNA samples for 15 minutes with rotation at room temperature. The beads were further washed three times with wash buffer (10 mM Tris-HCl, pH 7.4, 1 mM EDTA, 1 M NaCl and 0.1% Tween20) followed by one step wash with wash buffer at 65°C. 4sU-RNA was eluted from streptavidin beads with 100 µl freshly prepared 100 mM dithiothreitol (DTT) followed by a second elution with an additional 100 µl 100 mM DTT. RNA was further purified using the Sera-Mag carboxylate-modified magnetic beads before library preparation.

Strand-specific RNA-seq libraries were made with the NEBNext ultra RNA library prep kit for Illumina and subjected to Illumina sequencing. TT-seq reads were aligned to the human genome (UCSC hg38) and *Drosophila* dm6 genome, respectively. Alignments were processed with HISAT2, allowing only uniquely mapping reads with up to three mismatches within the 150 bp reads. The resulting reads were normalized to the total reads used for alignment (reads per million, r.p.m) for each strand. The read counts across each gene were counted with HT-seq with the union mode, and DESeq2 were used to perform the differentially gene expression analysis (Love et al. 2014). To estimate the fold changes based on the *Drosophila* spike-in RNA, size factors were calculated on the counts of the *Drosophila* genes and applied to the human gene counts prior to fold change estimation with DESeq2. The heatmap was generated by R package 3.4.3 with normalized counts from DESeq2.

### Quick Precision Run-On Sequencing (qPRO-seq)

qPRO-seq was performed as previously reported (Judd et al. 2020) with some modifications. In brief, HEK293T cells were seeded in 6-well plates and treated with DMSO or 20 μM TMPyP4 for 2 hours. After trypsin digestion and cell counting, the cells were washed twice with ice-cold PBS, permeabilized with 10 mL permeabilization buffer (10 mM Tris-HCl at pH 8.0, 10 mM KCl, 250 mM sucrose, 5 mM MgCl2, 1 mM EGTA, 0.1% (v/v) NP-40, 0.5 mM DTT, 0.05% (v/v) Tween-20, 0.2% (v/v) Triton-X100, 10% (v/v) Glycerol, 4U/mL SUPERase-In RNase inhibitor (Thermo Fisher Scientific) and 1× protease inhibitor in RNase-free water) and washed twice with cell wash buffer (10 mM Tris-HCl at pH 8.0, 10 mM KCl, 250 mM sucrose, 5 mM MgCl2, 1 mM EGTA, 0.5 mM DTT, 10% (v/v) Glycerol, 4U/mL SUPERase-In RNase inhibitor and 1× protease inhibitor in RNase-free water). 1×106 cells for each run-on reaction were resuspended in 50 μl freeze buffer (50 mM Tris-HCl at pH 8.0, 40% (v/v) glycerol, 5 mM MgCl2, 1 mM EDTA, and 0.5 mM DTT and 4 U/mL SUPERase-In RNase inhibitor in RNase-free water) and mixed with preheated 2× run-on master mix (10 mM Tris-HCl at pH 8.0, 5 mM MgCl2, 1 mM DTT, 300 mM KCl, 40 μM Biotin-11-CTP, 40 μM UTP, 40 μM ATP, 40 μM GTP and 1% (w/v) Sarkosyl in RNase-free water). After incubation in a thermomixer at 37℃ and 750 rpm for 5 minutes, total RNA was extracted by Trizol reagent and fragmented by base hydrolysis in 0.2 M NaOH on ice for 10 minutes, neutralized by adding 1 volume of 1 M Tris-HCl at pH 6.8 and precipitated with ethanol.

The RNA pellet was resuspended, mixed with 1 μl 10 μM VRA3 adapter (/5Phos/rUrNrN rNrNrN NGA TCG TCG GAC TGT AGA ACT CTG AAC/3InvdT/) and denatured at 65℃ for 30 seconds. 2 μl 10× T4 RNA ligase buffer, 2 μl 10 mM ATP, 1 μl SUPERase-In RNase inhibitor, 6 μl 50% PEG8000 and 2 μl T4 RNA ligase 1 (ssRNA ligase) (NEB) were added and incubated at 25℃ for 1 hour. 55 μl binding buffer (10 mM Tris-HCl at pH 7.4, 300 mM NaCl, 0.1% (v/v) Triton X-100, 1 mM EDTA and 4 U/mL SUPERase-In RNase inhibitor in RNase-free water) and 25 μl pre-washed streptavidin MagPoly beads (Smart-Lifesciences) were added and incubated for 20 minutes at 25℃. The beads were then washed with high salt wash buffer (50 mM Tris-HCl at pH 7.4, 2 M NaCl, 0.5% (v/v) Triton X-100, 1 mM EDTA and 4 U/mL SUPERase-In RNase inhibitor in RNase-free water) and low salt wash buffer (5 mM Tris-HCl at pH 7.4, 0.1% (v/v) Triton X-100, 1 mM EDTA and 4 U/mL SUPERase-In RNase inhibitor in RNase-free water). On-bead 5’ hydroxyl repair was done with T4 polynucleotice kinase (NEB) at 37℃for 30 minutes followed by on-bead 5’ decapping with RNA 5’ pyrophosphohydrolase (RppH) (NEB) at 37℃ for another 1 hour. For 5’ adapter ligation, the beads were resuspended in 1 μl 10 μM REV5 adapter (/5InvddT/CCT TGG CAC CCG AGA ATT CCA NrNrN rNrNrNr C) and 6 μl RNase-free water and denatured again. 2 μl 10× T4 RNA ligase buffer, 2 μl 10 mM ATP, 1 μl SUPERase-In RNase inhibitor, 6 μl 50% PEG8000 and 1 μl T4 RNA ligase 1 (ssRNA ligase) (NEB) were added and incubated at 25℃ for 1 hour. After two washes with high salt wash buffer and low salt wash buffer, the RNA was extracted with Trizol and precipitated with ethanol. The RNA pellet was resuspended with 4 μl primer RP1, 1 μl 10 mM each dNTP mix and 8.5 μl RNase-free water and denatured. 4 μl 5× RT Buffer, 1 μl 100 mM DTT, 0.5 μl SUPERase-In RNase inhibitor and 1 μl maxima H minus RT enzyme (Thermo Fisher Scientific) were mixed with the sample and incubated at 50℃ for 30 minutes, 65℃ for 15 minutes and then 85℃ for 5 minutes. The cDNA was purified with 1.8× volume Sera-Mag carboxylate-modified magnetic beads and eluted with 20 μL H2O.

The purified cDNA was amplified with NEBNext high-fidelity 2× PCR master mix, primer RP1 and indexing primers RPI-n. The DNA libraries were further size-selected with Sera-Mag carboxylate-modified magnetic beads and sequenced on the NovaSeq 6000 platform. qPRO-seq reads were aligned to the human hg38 genome. The resulting reads were normalized to the total reads used for alignment (reads per million, r.p.m.) and converted to bigwig files for visualization in the UCSC Genome Browser. Heatmap and metagene plots were made for the indicated windows using the average coverage (r.p.m.). PRO-seq data from HEK293T (GSM4730174 and GSM4730175) were also downloaded from our previous study (Wang et al. 2021) and were aligned to human genome hg38. The PRO-seq were plotted with G4-CUT&Tag and H3K27ac signals at promoters.

### Native Bisulfite Conversion Assay

Native bisulfite conversion assay was performed as previously described (Zheng et al. 2017) using EpiMark bisulfite conversion kit (NEB) with some modifications. After drug treatment, nuclei were isolated from HEK293T cells and were resuspended with 130 μl of bisulfite mix. After incubation at 22℃ for 36 hours, desulphonation reaction and genomic DNA clean up were carried out following the manufacturer's instruction. Putative G4 forming regions in the promoters of *NPM1* and *SRSF4* genes were amplified with the TAKARA Taq DNA polymerase. The PCR products were then purified, cloned into T-vector pMD19 (TAKARA) and transformed into competent DH5α *E. coli* cells. 10 colonies containing recombinant plasmids were sequenced for each sample. The percentages of C to T conversion in the putative G4 forming motifs were calculated.

**Immunofluorescence Microscopy and Analysis**

HeLa cells were seeded on a cover slip and were cultured for 24 hours before treatment. Cells were then pre-fixed with a solution of 50% DMEM and 50% methanol/acetic acid (3:1) for 10 minutes. After a wash with 3:1 methanol/acetic acid, cells were fixed with 3:1 methanol/acetic acid for another 10 minutes. Next, cells were permeabilized with 0.1% Triton X-100 in PBS buffer for 3 minutes, and blocked with 2% fat-free milk in PBS for 1 hour. Cells were incubated with 2 µg recombinant BG4-EGFP antibody in 2% fat-free milk for 2 hours and washed 5 times for 1 hour with 0.1% Tween 20 in PBS under gentle rocking. For nuclear staining, cells were incubated with 2 µg/µL of DAPI (4',6-Diamidino-2-Phenylindole, Dihydrochloride) (Thermo Fisher Scientific, D1306) for 30 minutes. The cover slides were mounted with mounting medium and imaged with a Leica SP8 microscopy. EGFP was excited with a 488 nm laser line and its emission was collected in the range 498-545 nm. Smart gain was set at 801.9 V and smart offset was -0.26%. The 405 nm laser line were used for excitation of DAPI and its emission was collected in the range of 413-462 nm. For this channel, smart gain was 770.3 V and smart offset was -0.18%. Images were acquired taking 8.7 s under 600 Hz scanning speed without Z-stack. For each group, images of 4–6 fields of vision were taken for every sample with fixed laser line intensity. For quantification of G4 intensities, we randomly selected 51 nuclei in each group, and the mean fluorescence intensities of G4s in each nuclear were calculated by dividing the total intensities of BG4-EGFP with the nuclear area marked by DAPI using the Leica LASX software. The same set of samples were processed and imaged in one batch to reduce experimental variation. All the procedures were performed at room temperature if not otherwise described.

**Stellaris RNA Fluorescence In Situ Hybridization (FISH)**

Stellaris RNA FISH were performed as previously described (Raj et al. 2008; Liang et al. 2015). Clean cover slips were placed in 6-well plates and 1×106 HeLa cells per well were seeded. The cells were treated with DMSO or 20 μM TMPyP4 for 8 hours and washed once with PBS. Then the cells were fixed with 3.7% formaldehyde for 10 minutes at room temperature and permeabilized with 70% ethanol for 6 hours at 4℃. The cells were washed with wash buffer A (10% formamide and 2× saline-sodium citrate buffer) and hybridized with hybridization buffer (100 mg/mL dextran sulfate, 10% formamide and 2× saline-sodium citrate buffer) containing 125 nM specific Stellaris FISH probes in a 37℃ cell culture incubator for 12 hours. The cells were washed once with wash buffer A for 30 minutes at 37℃ and stained with 5 ng/mL DAPI in wash buffer A for another 30 minutes at 37℃. After wash with wash buffer B (2× saline-sodium citrate buffer), the cover slips containing cells were mounted onto microscope slides with anti-fade mounting medium and sealed with nail polish. With a 63× 1.4 oil objective, images were acquired on a Leica SP8 STED confocal microscope. Quasar 670 was excited with a 638 nm laser line and its emission was collected through a 411-456 nm, 650-794 nm dual band pass filter. Quasar 570 was excited with a 552 nm laser line and its emission was collected through a 411-456 nm, 559-703 nm dual band pass filter. The 405 nm laser line were used for excitation of DAPI and its emission was collected through a 411-456 nm band pass filter. Z-stacks were acquired with 0.3 μm step size. For figure generation and quantification of nascent transcript intensity, images from both channels were binned in z by 30 slices. The bright single nuclear spot was considered as representing a nascent transcript, and its fluorescence intensity was calculated as the sum of gray values of each pixel. Under fixed laser line intensity, every sample in the same group took images of 10 fields of vision. And for each group, equal number of punctate spots, 30 for *GAPDH* and 36 for *ACTG1*, were randomly selected and their fluorescence intensities were determined. All samples used for this analysis were processed together and all data analyzed for this quantification was acquired within one day to lessen the chance of drift due to laser excitation intensity.

### Reporter Gene Assay and ChIP-qPCR

Putative G4 forming regions in the promoters of *NPM1*, *SRSF4*, *HSPA8*, *H2AX* and *SERBP1*, showing signal enrichments in G4-CUT&Tag, were amplified and cloned into pGL3 basic luciferase reporter vector (Promega) (primers are shown in supplemental table S1). For luciferase reporter assay, HEK293T cells were seeded in 24-well plates and transfected with or without recombinant luciferase reporter plasmids. 2 hours post transfection, TMPyP4 or PDS were added to the medium and the cells were incubated for another 24 hours before assaying for luciferase activity using the firefly luciferase assay kit (US Everbright Inc.). Briefly, the growth medium was removed and cells were rinsed once with PBS. 100 μl of 1× lysis buffer was added to each well and then the plates were shaken for 20 minutes at room temperature. 4 μl of supernatant was transferred into 384-well plate, mixed with 8 μl of firefly luciferase assay buffer and immediately measured on a Tecan Spark multimode microplate reader.

For ChIP-qPCR assays, 1×107 HEK293T cells were plated in 10 cm dish and transfected with 10 μg recombinant luciferase reporter plasmids. After treatment with DMSO or TMPyP4 as mentioned above, cells were harvested by trypsin digestion and washed twice with PBS. Then, the cells were fixed and employed in chromatin immunoprecipitation as mentioned above with some modifications. Briefly, 200 μl of sheared DNA were used for immunoprecipitation with 5 μg of antibody and 15 μl of pre-blocked Dynabeads Protein G (Invitrogen). After extensive washes, the captured DNA was eluted, purified and subjected to real-time PCR (qPCR) analysis. To avoid the interference of genomic DNA, the primers were designed to span the insertion-vector junctions (Supplemental Table S1). For the input control, 10% of the sheared DNA was directly purified without immunoprecipitation and was used for qPCR with the same primers.

### Liquid Chromatography with Electrospray Ionization Tandem Mass Spectrometry (LC-ESI-MS/MS)

LC-ESI-MS/MS experiments were performed on a Thermo TSQ Quantis triple-stage quadrupole mass spectrometer under the positive ion mode. The injection was automatically performed by an UltiMate 3000 HPLC equipped with an autosampler. The chromatographic separation was carried out on a Hypersil GOLD C18 HPLC columns at 40 °C. The mobile phase for determination of compound was composed of 0.1% fomic acid H2O (A) and acetonitrile (B). The following gradient condition was used: 0–0.5 min, 5% B; 0.5–5 min, 5–95% B; 5–7 min, 95% B; 7-8.1 min 95-5% B, 8.1-12 min 5% B. The flow rate was 0.2 mL/min. A volume of 5 μL of each sample were typically loaded for each analysis. In all experiments, the electrospray ionization was set at 3.5 kV and the vaporizer temperature was 275°C. Selected Reaction Monitoring (SRM) mode was used and the cycle time is 0.3 second. The precursor m/z for PDS was 299 and the product m/z were 234.58 and 256.10 with collision energies of 16.74 eV and 10.82 eV, respectively. TMPyP4 has a precursor m/z of 226 and product m/z of 215.86 and 220.91 with collision energies of 16.31 eV and 15.51 eV.

### Co-immunoprecipitation of Core Promoter and nanoLC-FAMIS-MS/MS

A biotin-labeled DNA oligonucleotide (5’-GCG TGT AGT GCA CTT GGG CGC CTA TAA TAA TGG GTG GGT GGG GAC ATC TCA TTC TTG GGG ACG GGA GGG TTC ATA CAT CTA GAC GCG-biotin-3’), which was G-rich and contained core promoter elements, and its reverse complement DNA oligo were synthesized by Sangon Biotech. The G-rich oligo was annealed in DNA binding buffer (10 mM Tris-HCl at pH 8.0, 1 mM EDTA, 50 mM KCl and 0.05% NP-40) and mixed with its reverse complement DNA oligo to form G4-containing core promoter DNA. 120 μl of pre-blocked streptavidin MagPoly beads (Smart-Lifesciences) were incubated with 150 nM annealed double-stranded DNA in 600 μl DNA binding buffer with or without 20 μM TMPyP4. HEK293T cells from 15 cm-dishes were harvested and washed once with ice-cold PBS. The cells were resuspended in 2.5× cell volume of cold buffer A (10 mM HEPES-KOH at pH 7.9, 1.5 mM MgCl2 and 10 mM KCl) and incubated on ice for 10 minutes. The cells were further added with 3.5× cell volume of buffer A containing 0.3% NP-40 and 2× protease inhibitor and incubated for another 10 minutes on a rotator at 4℃. The cell lysate was centrifuged for 5 minutes at 1,300 g and 4°C, and the supernatant was discarded. The pellet was resuspended with two-fold volume of cold buffer C (20 mM HEPES-KOH at pH 7.9, 20% glycerol (v/v), 420 mM KCl, 2 mM MgCl2, 0.2 mM EDTA, 0.1% NP-40, 0.5 mM DTT and 1× protease inhibitor) and rotated for 4 hours at 4℃. After 15 minutes of spin at the maximal speed, the supernatant containing nuclear proteins was collected and diluted two folds with protein binding buffer (50 mM Tris-HCl at pH 8.0, 0.25% NP-40, 1mM Tris (2-carboxyethyl) phosphine (TCEP) and 1×protease inhibitor). Then, these streptavidin MagPoly beads with core promoter DNA were rotated with nuclear protein extract for 4 hours at 4℃. After extensive washes with protein binding buffer containing 140 mM KCl and TBS (20 mM Tris-HCl at pH 7.6 and 150 mM NaCl), the captured proteins were eluted and digested via two-step digestion in urea buffer as previously reported (Keilhauer et al. 2015; Liang et al. 2017). Briefly, the beads were mixed with 25 μl of elution buffer I (50 mM Tris-HCl at pH 7.6, 1 mM DTT and 2.5 μg trypsin gold (Promega), 2 M urea) and rotated in a thermomixer for 30 minutes at 27℃. The supernatant was separated and collected. The beads were washed twice in 50 μl elution buffer II (50 mM Tris-HCl at pH 7.6, 5 mM IAA and 2 M urea) and the supernatants were pooled. The samples were placed at room temperature overnight for complete digestion. 7 μl of 10% trifluoroacetic acid (TFA) was added to stop the digestion reaction. The acidified peptides were desalted with the C18 Stage tips (Thermo Fisher Scientific) and analyzed by an Orbitrap Exploris 480 mass spectrometer equipped with the FAIMS Pro interface without tandem mass tag (TMT) labeling. Samples were analyzed on an EASY-nLC system using a Hypersil GOLD C18 Selectivity HPLC column and a 3-hour pre-programmed gradient. Full MS resolutions were set to 60,000 at m/z 200 and Mass range was set to 350–1500. Raw files were processed with Proteome Discoverer 2.4 using a four-stage searching program. To validate peptide identification, the automatic mode which controls peptide level error rate if possible was selected. The strict target false discovery rate (FDR) for PSMs or peptides was set at 0.01, and peptides with a lower confidence than 0.01 are excluded from the final result. For protein assembling, all proteins with a q-value higher than 0.01 will receive high confidence, while higher than 0.05 will receive medium confidence.

**Supplemental Figures**


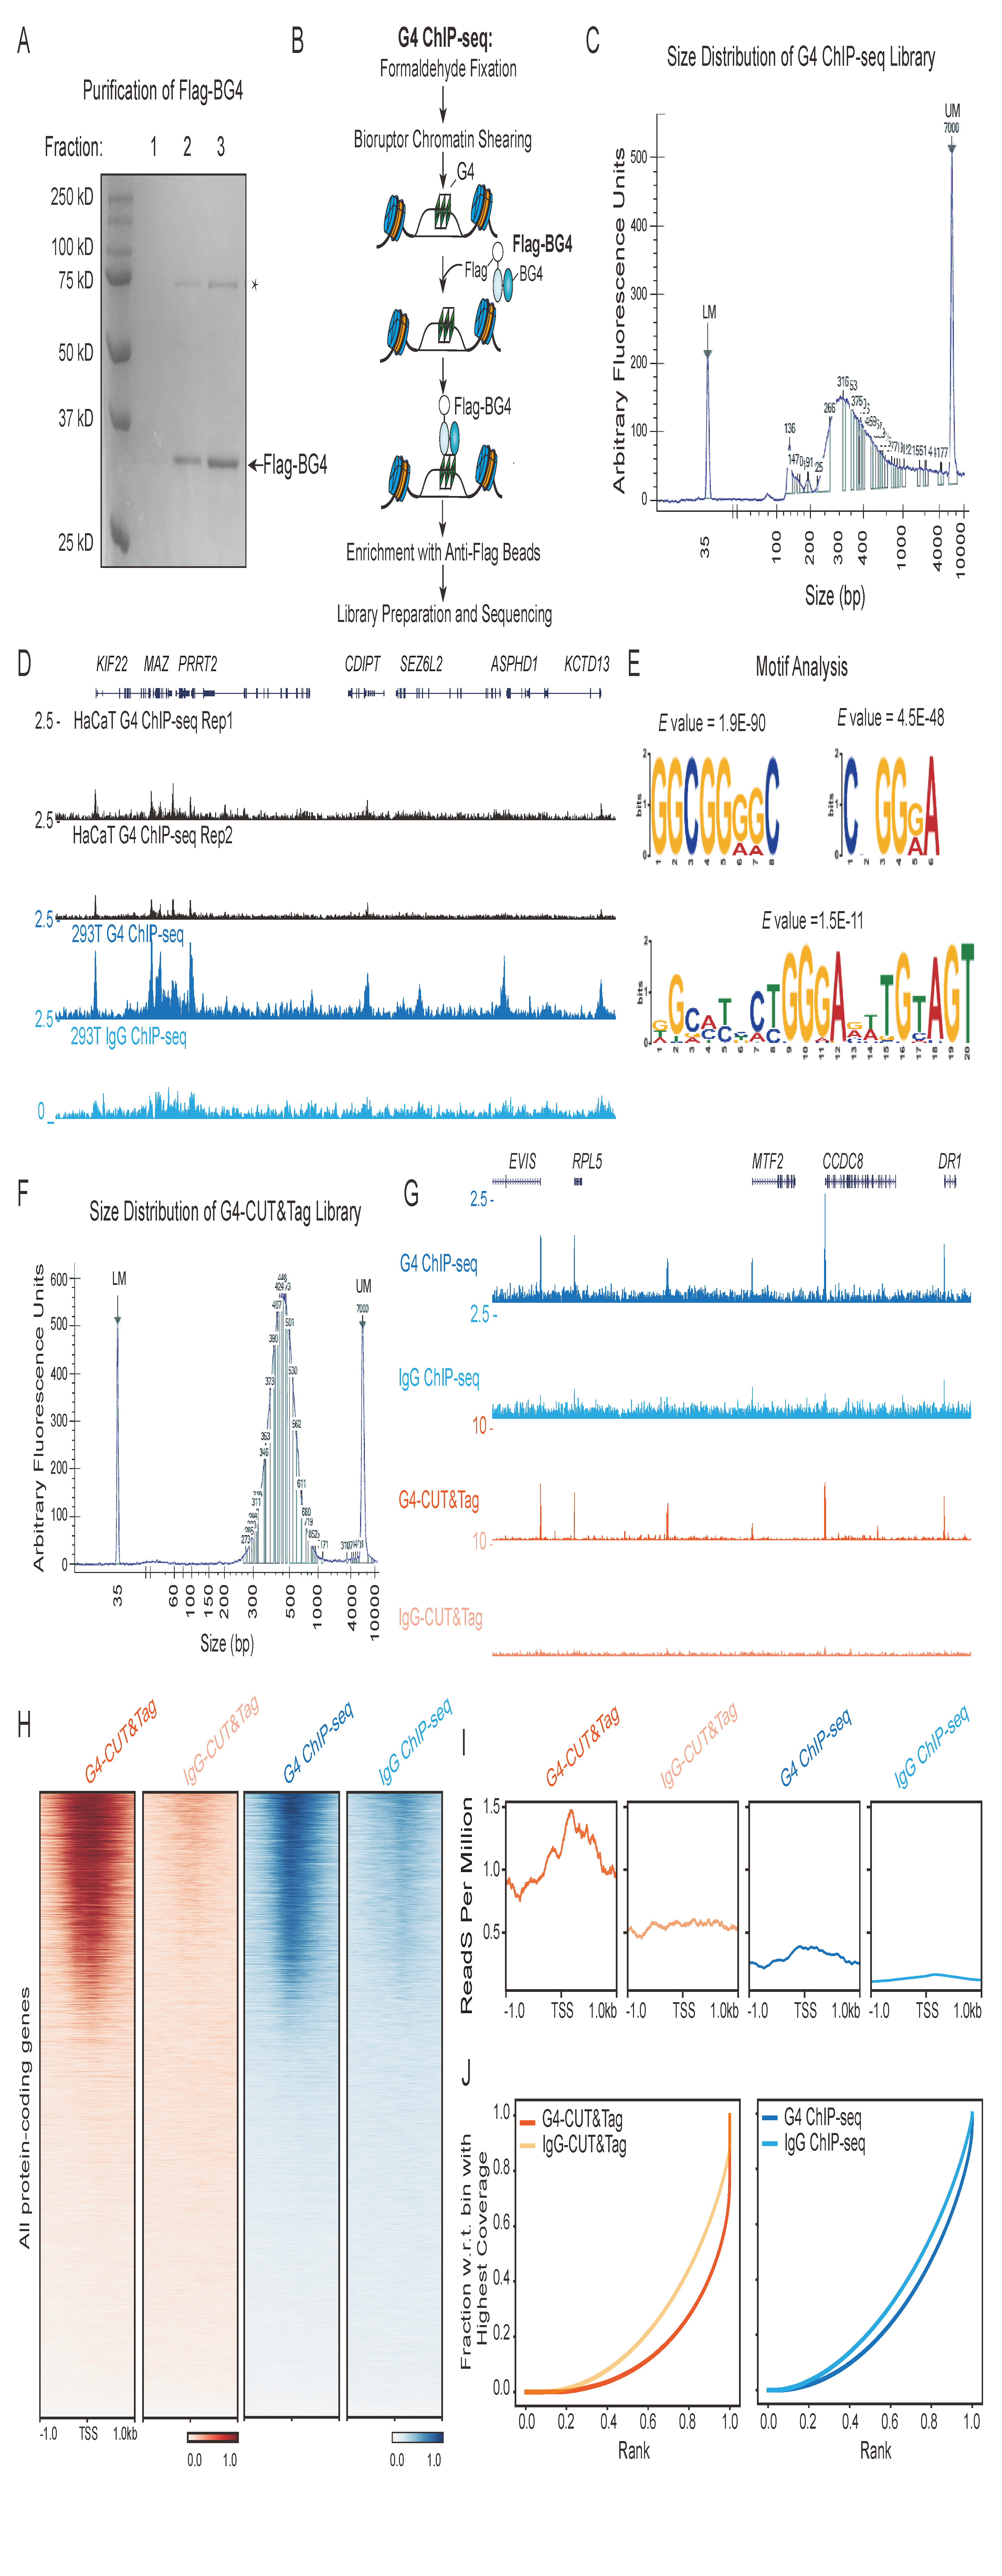


**Supplemental Figure S1. Comparison of genome-wide native G4-CUT&Tag with G4 ChIP-seq.**

(A) SDS-PAGE analysis of recombinant G4-structure-specific single-chain antibody Flag-BG4 (~31 kD, arrow). The asterisk represents non-specific products. (B) Workflow for G4 ChIP-seq analysis (Hansel-Hertsch et al. 2018). After fixation by formaldehyde, nuclei were isolated and sheared by sonication. Genomic fragments containing G4 structures were enriched using Flag-BG4 antibody and anti-Flag M2 beads. After extensive washing, immunoprecipitated DNA was eluted and purified for downstream library preparation and sequencing. (C) The size distribution of G4 ChIP-seq library. LabChip analysis of a G4 ChIP-seq library was shown. (D) UCSC Genome Browser tracks of G4 ChIP-seq in HaCaT (Hansel-Hertsch et al. 2018) and HEK293T cells. (E) Motif analysis of HEK293T G4 ChIP-seq peaks. G4 ChIP-seq peaks were called by MACS2 using IgG control. The summits of peaks were extended to 50 bp for subsequent motif analysis with MEME-ChIP. (F) LabChip analysis of G4-CUT&Tag sequencing libraries. (G) Genome browser tracks of G4 ChIP-seq and G4-CUT&Tag in HEK293T. The reads were aligned to human genome hg38 and normalized by reads per million. (H and I) Heatmaps and metaplots of G4 signals obtained from G4-CUT&Tag and G4 ChIP-seq at the promoters of all protein-coding genes. (J) Fingerprint plots of G4-CUT&Tag (left) and G4 ChIP-seq (right) and the corresponding IgG controls in HEK293T cells. G4-CUT&Tag shows a better signal to noise ratio than G4 ChIP-seq.





**Supplemental Figure S2. Comprehensively profiling of genome-wide native G4s at enhancers.**

(A and B) UCSC Genome Browser tracks of G4 ChIP-seq, G4-CUT&Tag, POLR2A, H3K27ac, H3K4me3, H3K4me2, H3K4me1 ChIP-seq, and ATAC-seq at promoters (A) and enhancers (B). Tracks were normalized by reads per million. (C-E) Heatmaps and metaplots of G4-CUT&Tag signals, H3K27ac, H3K4me3, H3K4me2, H3K4me1 and POLR2A ChIP-seq signals, as well as ATAC-seq signals at active enhancers and poised enhancers. Active and poised enhancers were characterized utilizing the occupancy of H3K27ac and H3K4me1. (F) Boxplots showing the G4-CUT&Tag, histone modifications, and POLR2A ChIP-seq signal intensity at promoters, active enhancers, and poised enhancers. (G and H) Motif analysis of G4-CUT&Tag peak summits by MEME-ChIP, revealing the presence of possible G-rich recurring motifs (G). The occurrence frequencies of these motifs are shown as well (H).


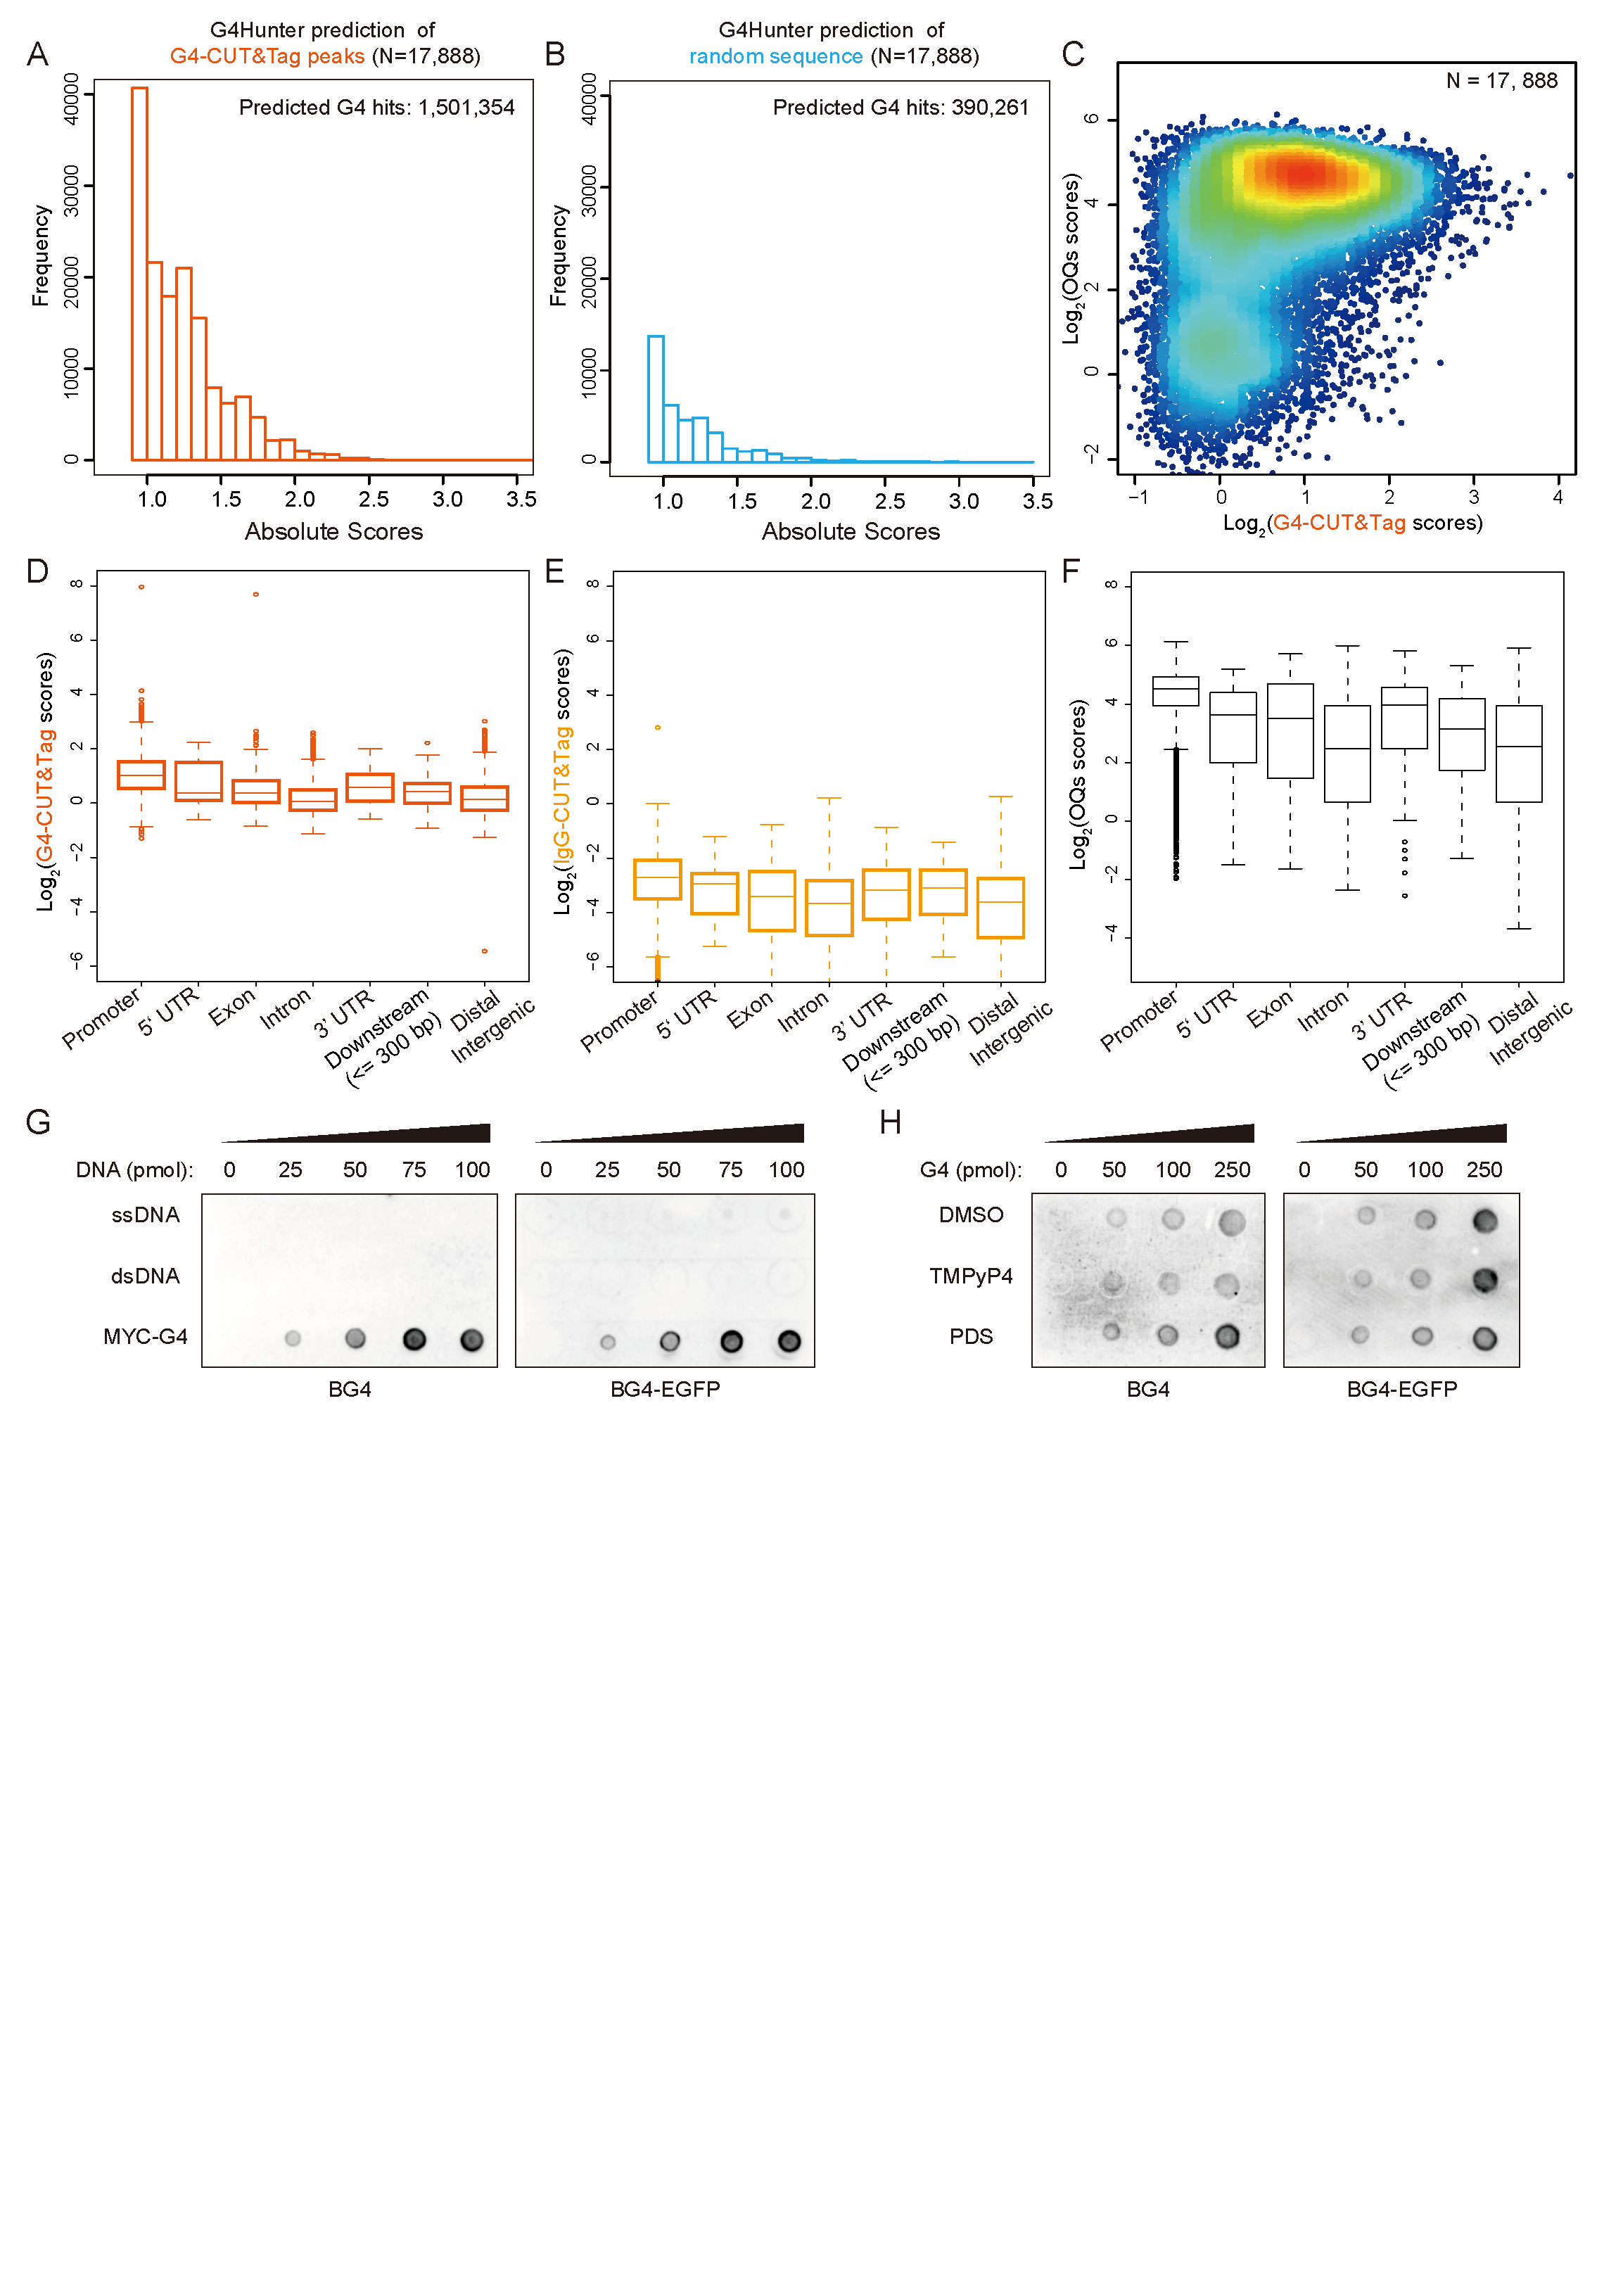


**Supplemental Figure S3. Characterization of native G4 signals in G4-CUT&Tag.**

(A and B) G4 prediction of G4-CUT&Tag peaks (A) and random sequences (B) by G4Hunter (Bedrat et al. 2016). 1,501,354 G4 motifs were predicted with the 17,888 G4-CUT&Tag peaks, while the matched random sequences from the human genome generate only 390,261 G4 hits. The distribution of absolute G4Hunter scores was shown in histogram plots. (C) Dot plots of G4-CUT&Tag and G4-seq scores. The vast majority of G4-CUT&Tag peaks contain OQs detected by G4-seq (GSM3003540). (D-F) The signal intensity distributions of G4-CUT&Tag (D), IgG-CUT&Tag (E), and G4-seq (F) across various genomic regions. (G) Dot-bolt assay was employed to investigate the specificity of BG4 and BG4-EGFP to G4s. Diluted ssDNA, dsDNA and annealed MYC-G4 DNA (0 pmol, 25 pmol, 50 pmol, 75 pmol, and 100 pmol) were blotted onto the nylon membrane and the dot-blotted membranes were incubated with the BG4 or BG4-EGFP, mouse Anti-Histag antibody, and HRP-conjugated anti-mouse secondary antibody in sequence. Signals were detected with the ECL regents. BG4-EGFP has similar specificity and sensitivity as BG4. (H) Dot-bolt assay was performed with annealed MYC-G4 oligonucleotides after treatment with DMSO or 20 μM TMPyP4/PDS showing that TMPyP4/PDS did not seem to block the interaction between MYC-G4 and BG4 or BG4-EGFP.


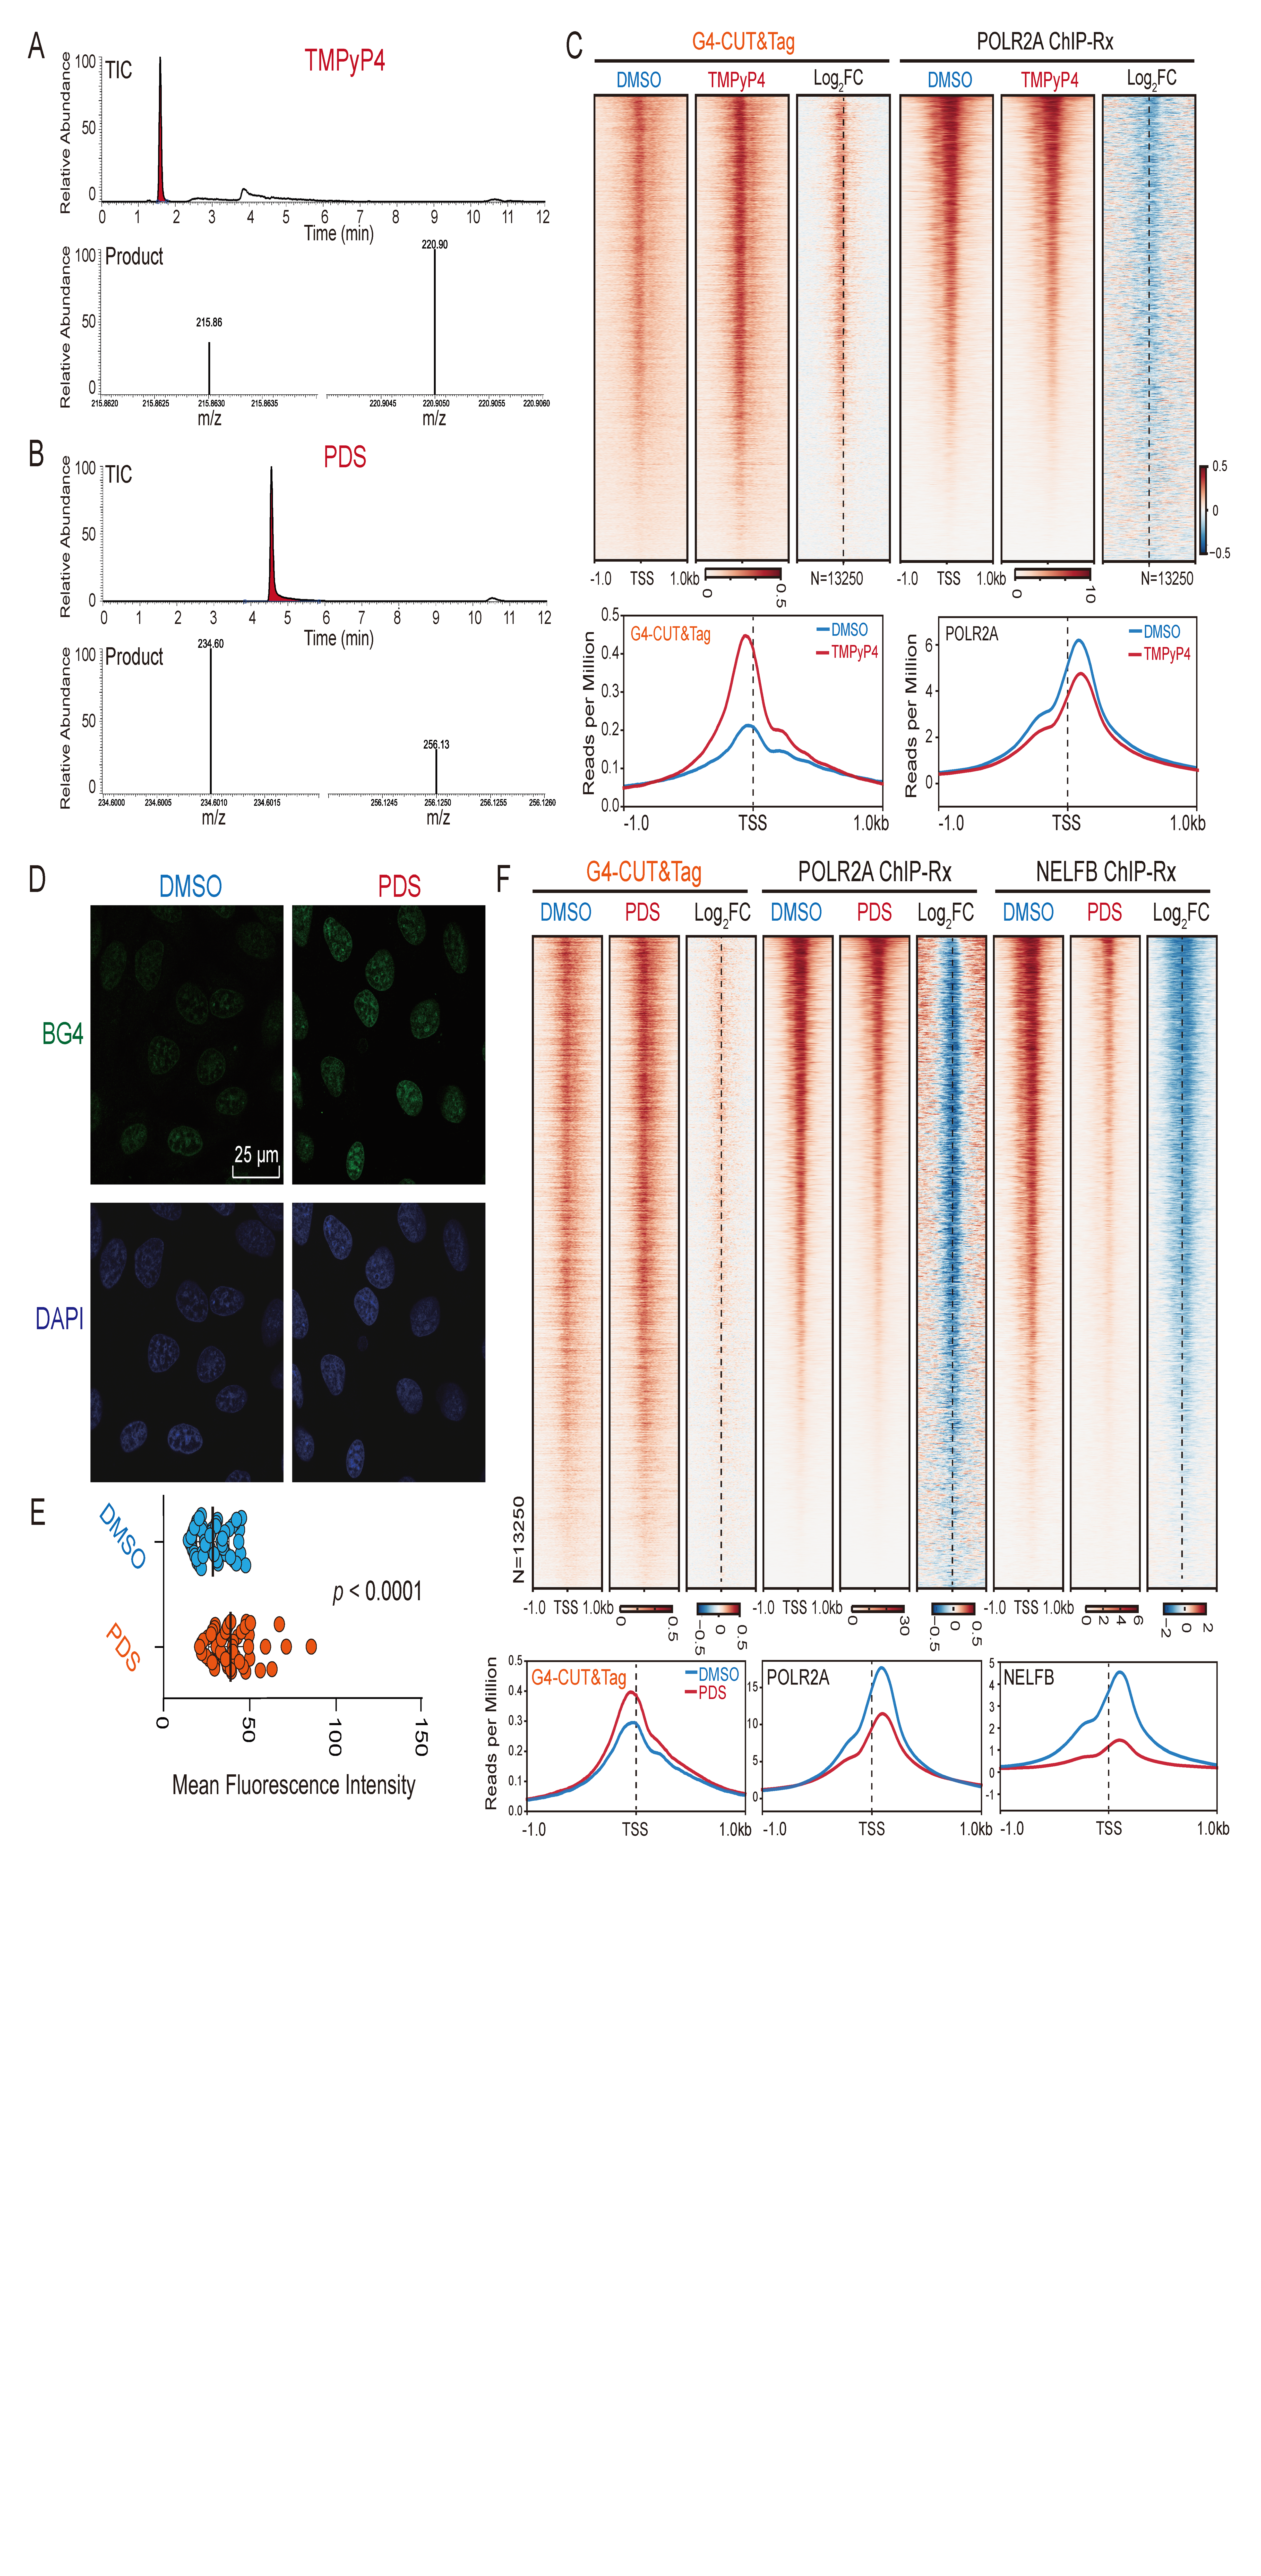


**Supplemental Figure S4. The reciprocal interaction between RNA polymerase II and native G4 in the genome.**

(A and B) LC-MS/MS analysis of G4-stabilizing ligands TMPyP4 (A) and PDS (B). (C) Heatmap and metaplot analyses of G4-CUT&Tag and POLR2A ChIP-Rx signals around TSSs. TMPyP4 treatment for 1 hour induces the global upregulation of G4 signals especially at the upstream of TSSs, while POLR2A signals decrease around TSSs. (D and E) Immunostaining of G4 using BG4-EGFP (green) in HeLa cells incubated with or without PDS for 1 hour (D). The nuclei were stained with DAPI (blue). For each sample, images of 6 fields of vision were acquired with fixed parameters. 51 nuclei in each sample were randomly selected, and the mean fluorescence intensities of G4s in each nuclear were calculated by dividing the total intensities of BG4-EGFP with the nuclear area marked by DAPI (E). (F) Heatmaps and metaplots of G4-CUT&Tag, POLR2A, and NELFB ChIP-Rx signals. PDS upregulates native G4s and downregulates Pol II and NELF occupancy around TSSs.


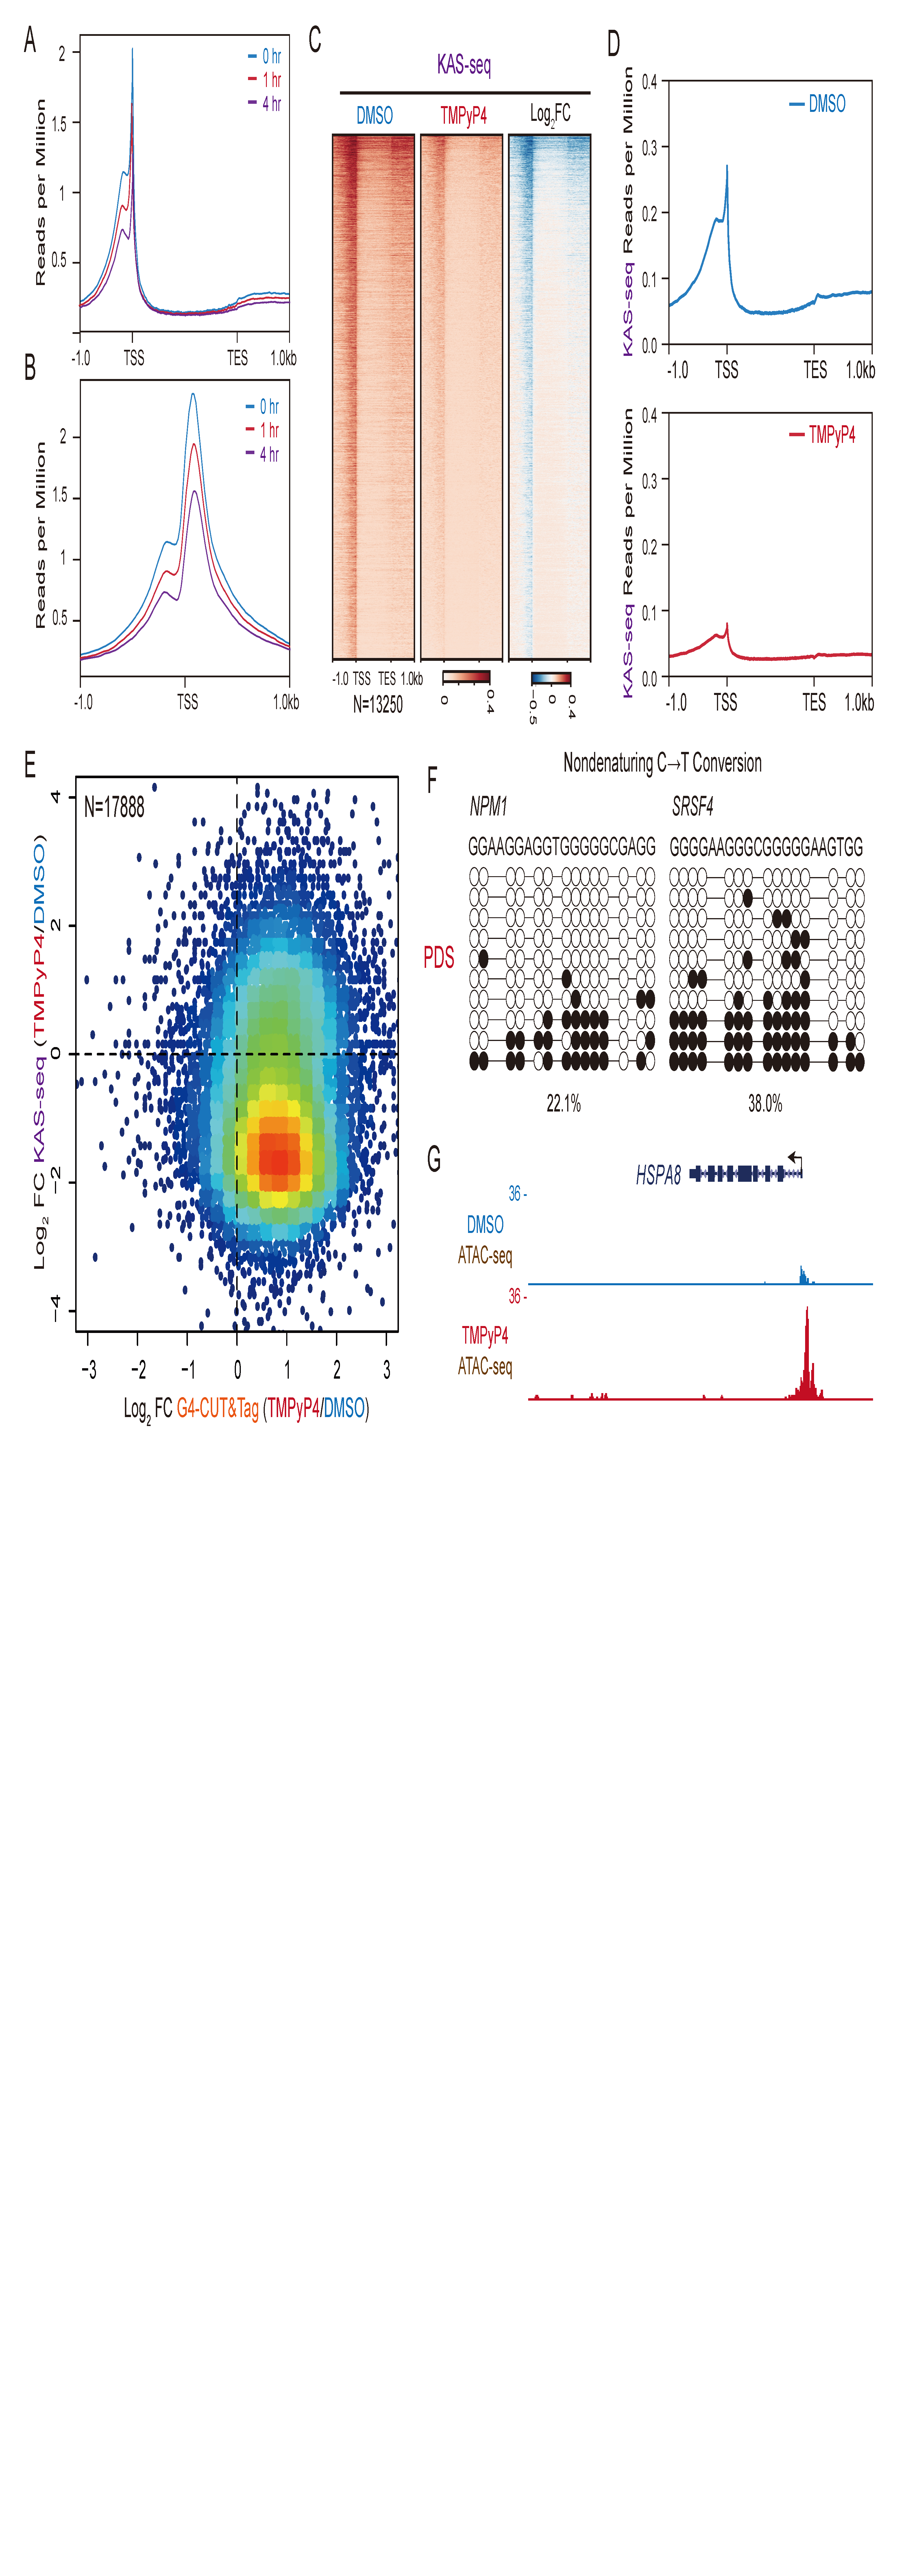


**Supplemental Figure S5. G4 stabilization by G4 ligands rapidly alters chromatin states with increased dsDNA melting and chromatin accessibility.**

(A and B) Metagene analysis of POLR2A ChIP-Rx signals in HEK293T cells treated with TMPyP4 for denoted time intervals. Pol II occupancy is impaired by TMPyP4 in a time-dependent manner (A), especially at promoter regions (B). (C and D) Heatmap (C) and metagene (D) analyses of KAS-seq signals under the treatment of TMPyP4 at all the protein-coding genes. TMPyP4 significantly downregulates KAS-seq signals at TSS, gene body, and TES regions. (E) Scatterplots of the log2 fold changes of KAS-seq signals versus the log2 fold changes of G4-CUT&Tag signals with or without TMPyP4 treatment. The majority of regions with increased G4s show decreased KAS-seq signals. (F) Nondenaturing C to T conversion at two G4 forming motifs in *NPM1* and *SRSF4* promoters under PDS treatment. Similar to TMPyP4, PDS treatment also increases the percentages of C to T conversion. (G) A snapshot of ATAC-seq tracks with TMPyP4 treatment at the *HSPA8* locus.





**Supplemental Figure S6. Disruption of G4 dynamics with G4 stabilizing ligands substantially restrains nascent RNA transcription.**

(A) MA (ratio intensity) plot of nascent RNA synthesis in DMSO or TMPyP4 treated cells. TT-seq was performed with the counts normalized with *S2* spike-in controls. (B) Heatmap of strand-specific TT-seq signals from TSS to TES. The heatmaps were sorted by decreasing signal intensity. (C) Heatmap of TT-seq signals at active and poised enhancers showing decreased nascent RNA synthesis after TMPyP4 treatment. (D) Schematic of Stellaris RNA fluorescence *in situ* hybridization (FISH). After TMPyP4 treatment, HeLa cells were fixed and permeabilized. The cells were hybridized with specific Stellaris FISH probes, and then Leica SP8 STED confocal microscope was employed to detect nascent transcripts (punctate fluorescent signals indicated by white arrowheads) located in nuclei (blue). (E-H) RNA FISH of *GAPDH* (E) and *ACTG1* (G) in HeLa cells after treatments of DMSO or TMPyP4. Images were acquired with 0.3 μm step size and binned in z by 30 slices for both EGFP and DAPI channel. Under fixed laser line intensity, images of 10 fields of vision were taken for each sample. And for each group, equal number of RNA punctate spots, 30 for *GAPDH* (F) and 36 for *ACTG1* (H), were randomly selected and their fluorescence intensities were determined. The statistical analysis was performed by a two-tailed Mann-Whitney *U* test. The results reveal that TMPyP4 treatment could inhibit the nascent RNA synthesis of *GAPDH* and *ACTG1*.

**Supplemental Table**

**Supplemental Table S1. Primers used in reporter gene assay and ChIP-qPCR.**

| *NPM1*-promoter-F | 5’-CCG GAA TTC GGC TAA CCC GCC ATA TCT TA-3’ |
| --- | --- |
| *NPM1*-promoter-R | 5’-CCG CTC GAG CGG GTG GCG GCA CGC ACT TA-3’ |
| *SRSF4*-promoter-F | 5’-CCG GAA TTC CAA AAG CAC AAA CGC TCG C-3’ |
| *SRSF4*-promoter-R | 5’-CCG CTC GAG CCC GGC AAC GGC AGT GAT GG-3’ |
| *HSPA8*-promoter-F | 5’-CCG GAA TTC AAC CTT CGC AGC CAT TTT G-3’ |
| *HSPA8*-promoter-R | 5’-CCG CTC GAG ACA AAA AAC CCA AGA GCT GC-3’ |
| *H2AX*-promoter-F | 5’-CCG GAA TTC TCA GAC TCC ACC CCT TTG G-3’ |
| *H2AX*-promoter-R | 5’-CCG CTC GAG GCT AGC GAG GTA GAC CGG TG-3’ |
| *SERBP1*-promoter-F | 5’-CCG GAA TTC GGA CTT GGC ACA GGC AGG G-3’ |
| *SERBP1*-promoter-R | 5’-CCG CTC GAG CCG CGC CGA GCC AAG AGC GC-3’ |
| *SRSF4*-qPCR-F | 5’-AAC TGT TGG GAA GGG CGA TC-3’ |
| *SRSF4*-qPCR-R | 5’-CGG AAG TGT CCG CAC CTC CT-3’ |

**References**

Bailey TL, Boden M, Buske FA, Frith M, Grant CE, Clementi L, Ren J, Li WW, Noble WS. 2009. MEME SUITE: tools for motif discovery and searching. *Nucleic Acids Res* **37**: W202-208.

Bedrat A, Lacroix L, Mergny JL. 2016. Re-evaluation of G-quadruplex propensity with G4Hunter. *Nucleic Acids Res* **44**: 1746-1759.

Corces MR, Trevino AE, Hamilton EG, Greenside PG, Sinnott-Armstrong NA, Vesuna S, Satpathy AT, Rubin AJ, Montine KS, Wu B et al. 2017. An improved ATAC-seq protocol reduces background and enables interrogation of frozen tissues. *Nat Methods* **14**: 959-962.

Hansel-Hertsch R, Spiegel J, Marsico G, Tannahill D, Balasubramanian S. 2018. Genome-wide mapping of endogenous G-quadruplex DNA structures by chromatin immunoprecipitation and high-throughput sequencing. *Nat Protoc* **13**: 551-564.

Judd J, Wojenski LA, Wainman LM, Tippens ND, Rice EJ, Dziubek A, Villafano GJ, Wissink EM, Versluis P, Bagepalli L. 2020. A rapid, sensitive, scalable method for Precision Run-On sequencing (PRO-seq). *BioRxiv*.

Kaya-Okur HS, Wu SJ, Codomo CA, Pledger ES, Bryson TD, Henikoff JG, Ahmad K, Henikoff S. 2019. CUT&Tag for efficient epigenomic profiling of small samples and single cells. *Nat Commun* **10**: 1930.

Keilhauer EC, Hein MY, Mann M. 2015. Accurate protein complex retrieval by affinity enrichment mass spectrometry (AE-MS) rather than affinity purification mass spectrometry (AP-MS). *Mol Cell Proteomics* **14**: 120-135.

Langmead B, Trapnell C, Pop M, Salzberg SL. 2009. Ultrafast and memory-efficient alignment of short DNA sequences to the human genome. *Genome Biol* **10**: R25.

Liang K, Smith ER, Aoi Y, Stoltz KL, Katagi H, Woodfin AR, Rendleman EJ, Marshall SA, Murray DC, Wang L et al. 2018. Targeting Processive Transcription Elongation via SEC Disruption for MYC-Induced Cancer Therapy. *Cell* **175**: 766-779 e717.

Liang K, Volk AG, Haug JS, Marshall SA, Woodfin AR, Bartom ET, Gilmore JM, Florens L, Washburn MP, Sullivan KD et al. 2017. Therapeutic Targeting of MLL Degradation Pathways in MLL-Rearranged Leukemia. *Cell* **168**: 59-72 e13.

Liang K, Woodfin AR, Slaughter BD, Unruh JR, Box AC, Rickels RA, Gao X, Haug JS, Jaspersen SL, Shilatifard A. 2015. Mitotic Transcriptional Activation: Clearance of Actively Engaged Pol II via Transcriptional Elongation Control in Mitosis. *Mol Cell* **60**: 435-445.

Love MI, Huber W, Anders S. 2014. Moderated estimation of fold change and dispersion for RNA-seq data with DESeq2. *Genome Biol* **15**: 550.

Orlando DA, Chen MW, Brown VE, Solanki S, Choi YJ, Olson ER, Fritz CC, Bradner JE, Guenther MG. 2014. Quantitative ChIP-Seq normalization reveals global modulation of the epigenome. *Cell Rep* **9**: 1163-1170.

Raj A, van den Bogaard P, Rifkin SA, van Oudenaarden A, Tyagi S. 2008. Imaging individual mRNA molecules using multiple singly labeled probes. *Nat Methods* **5**: 877-879.

Ramírez F, Dündar F, Diehl S, Grüning BA, Manke T. 2014. deepTools: a flexible platform for exploring deep-sequencing data. *Nucleic Acids Res* **42**: W187-191.

Schwalb B, Michel M, Zacher B, Fruhauf K, Demel C, Tresch A, Gagneur J, Cramer P. 2016. TT-seq maps the human transient transcriptome. *Science* **352**: 1225-1228.

Wang K, Wang H, Li C, Yin Z, Xiao R, Li Q, Xiang Y, Wang W, Huang J, Chen L et al. 2021. Genomic profiling of native R loops with a DNA-RNA hybrid recognition sensor. *Sci Adv* **7**.

Wang Q, Xiong H, Ai S, Yu X, Liu Y, Zhang J, He A. 2019. CoBATCH for High-Throughput Single-Cell Epigenomic Profiling. *Mol Cell* **76**: 206-216 e207.

Wu T, Lyu R, You Q, He C. 2020. Author Correction: Kethoxal-assisted single-stranded DNA sequencing captures global transcription dynamics and enhancer activity in situ. *Nat Methods* **17**: 749.

Yu G, Wang LG, He QY. 2015. ChIPseeker: an R/Bioconductor package for ChIP peak annotation, comparison and visualization. *Bioinformatics* **31**: 2382-2383.

Zhang Y, Liu T, Meyer CA, Eeckhoute J, Johnson DS, Bernstein BE, Nusbaum C, Myers RM, Brown M, Li W et al. 2008. Model-based analysis of ChIP-Seq (MACS). *Genome Biol* **9**: R137.

Zheng KW, He YD, Liu HH, Li XM, Hao YH, Tan Z. 2017. Superhelicity Constrains a Localized and R-Loop-Dependent Formation of G-Quadruplexes at the Upstream Region of Transcription. *ACS Chem Biol* **12**: 2609-2618.
